# Supplementary material for: Selenophosphate synthetase 1 deficiency exacerbates osteoarthritis by dysregulating redox homeostasis
Source: PubMed Central journal article supplement (PMC8828855; doi:10.1038/s41467-022-28385-7), 2022-02-09
Supplement: 41467_2022_28385_MOESM1_ESM.pdf [file 41467_2022_28385_MOESM1_ESM.pdf]

SUPPLEMENTARY INFORMATION

**Selenophosphate synthetase 1 deficiency exacerbates osteoarthritis by dysregulating redox homeostasis**

Kang et al.

**Supplementary Figures 1–12**

**Supplementary Tables 1–8**

**Supplementary Note 1**

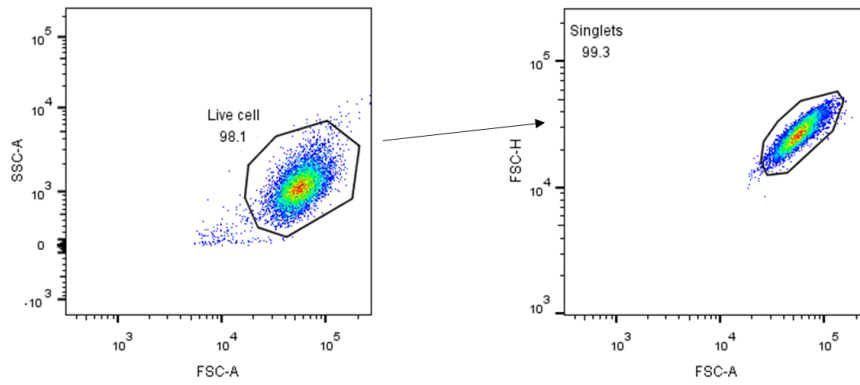

**Supplementary Fig. 1** Exemplified gating strategy for flow cytometry analysis in Fig. 2d,e. Mouse chondrocytes were gated by forward scatter (FSC) and side scatter (SSC) area (A) according to cell size and granularity to get rid of any debris or large clumps. Then, singlet cells were gated using FSC-A and FSC-height (H).

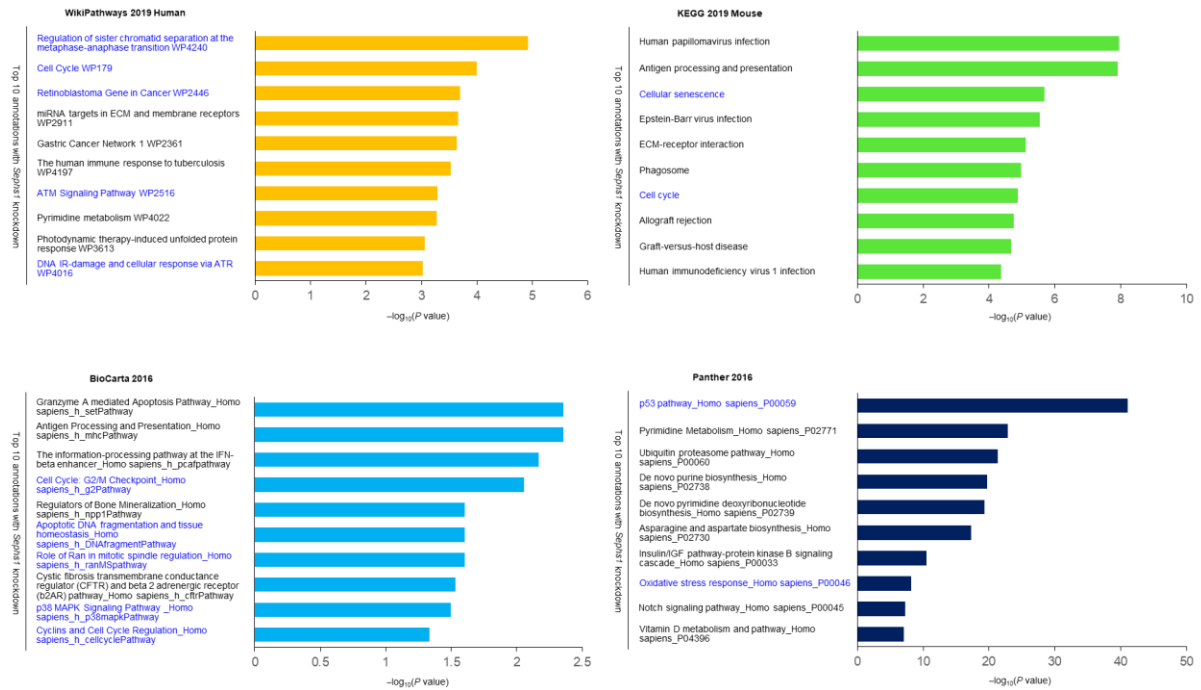

**Supplementary Fig. 2** Transcriptome analysis reveals that loss of *SEPHS1* activates pathways related to DNA damage response, cell cycle regulation, and cellular senescence in chondrocytes. Top 10 annotations of differentially expressed genes following knockdown of *Sephs1* in chondrocytes from Enrichr Pathways analysis, based on WikiPathways 2019 Human, KEGG 2019 Mouse, Biocarta 2016, and Panther 2016 pathway databases; the corresponding  $-\log_{10}(P \text{ values})$  are presented as graphs.  $P$  values are from Fisher's exact test.

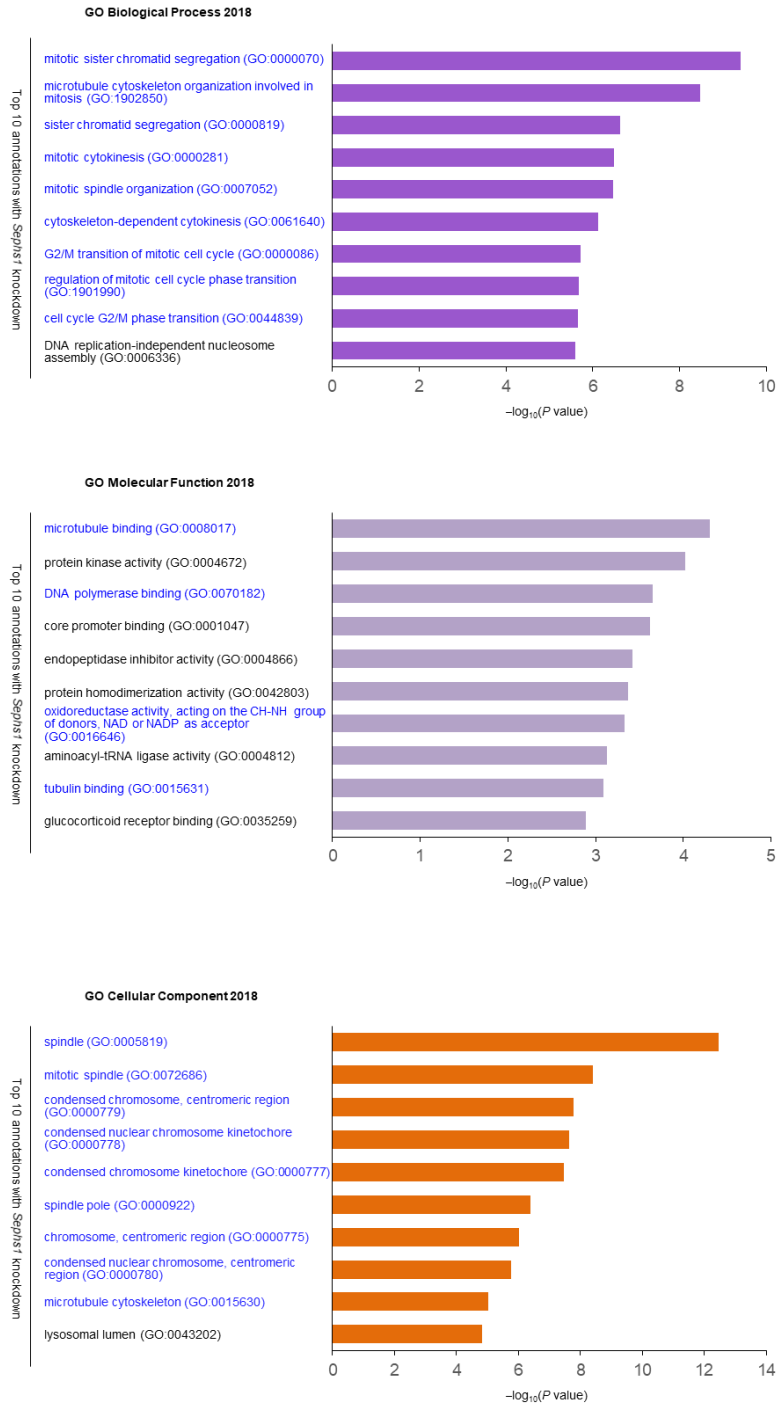

**Supplementary Fig. 3** Transcriptome analysis reveals that loss of *SEPHS1* activates ontologies related to cell cycle regulation, chromosome segregation, and oxidoreductase activity in chondrocytes. Top 10 annotations of differentially expressed genes following knockdown of *Sephs1* in chondrocytes from Enrichr Ontologies analysis, based on three Gene Ontology (GO) databases; the corresponding  $-\log_{10}(P \text{ values})$  are presented as graphs.  $P$  values are from Fisher's exact test.

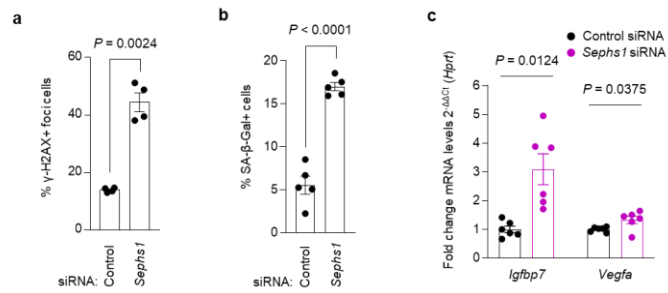

**Supplementary Fig. 4** Downregulation of SEPHS1 in chondrocytes leads to cellular senescence and upregulation of SASPs expression. **a**, **b** Quantification of **a** immunofluorescence positivity of  $\gamma$ -H2AX ( $n = 4$ ) or **b** SA- $\beta$ -Gal positivity ( $n = 5$ ) in primary cultured chondrocytes transfected with negative control siRNA or siRNA targeting *Sephs1*. **c** Relative mRNA expression of non-MMP families of SASP factors in chondrocytes transfected with negative control siRNA or siRNA targeting *Sephs1* ( $n = 6$ ). **a–c** Data represent means  $\pm$  s.e.m.  $P$  values are from two-tailed  $t$  test (**a–c**).

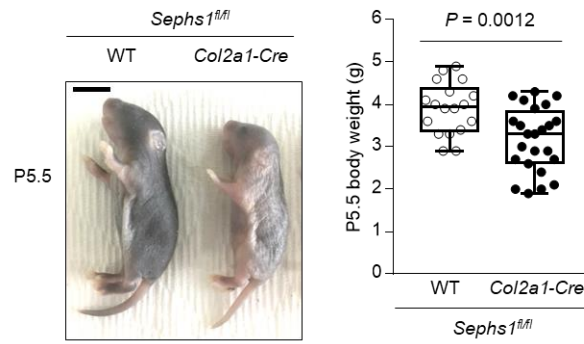

**Supplementary Fig. 5** Loss of SEPHS1 during skeletal development causes growth retardation in mice. Representative photograph and quantification of body weight on postnatal day 5.5 (P5.5) in *Sephs1<sup>fl/fl</sup>* ( $n = 18$ ) and *Sephs1<sup>fl/fl</sup>; Col2a1-Cre* mice ( $n = 24$ ). Scale bar: 1 cm. Data represent means  $\pm$  s.e.m.  $P$  values are from two-tailed  $t$  test. The box and whiskers plot shows median values (center line) and the 25<sup>th</sup> (bottom line) and 75<sup>th</sup> percentiles (top line) with whiskers indicating the range.

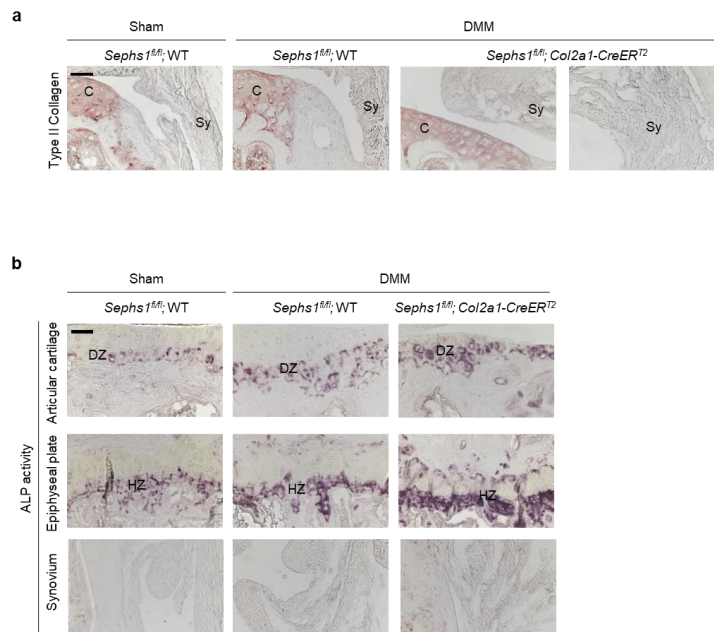

**Supplementary Fig. 6** Synovial ectopic calcification is not observed in WT and SEPHS1-deficient mice. **a** Type II collagen was detected by immunohistochemistry in knee joint sections of sham- or DMM-operated WT and *Sephs1*-iCKO mice. **b** ALP activity was examined using NBT/BCIP substrates in knee joint sections of WT and *Sephs1*-iCKO mice. ALP activity was detected in the deep zone of the articular cartilage and in the hypertrophic zone of the epiphyseal plate, but not in the synovium. Scale bars: **a**, **b** 50  $\mu$ m. Abbreviations: C, cartilage; Sy, synovium; DZ, deep zone; HZ, hypertrophic zone.

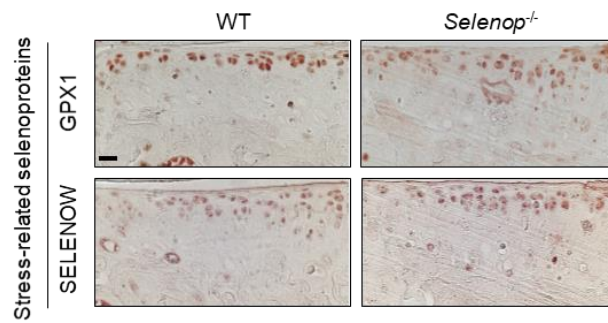

**Supplementary Fig. 7** Immunohistochemical staining of stress-related selenoproteins in cartilage sections of *Selenop* KO mice. GPX1 and SELENOW were detected by immunohistochemistry in cartilage sections from the knee joints of 12-week-old WT and *Selenop* KO mice. Because SELENOP is the major selenium transporter protein that delivers selenium throughout the body, we used *Selenop* KO mice to mimic a low circulating selenium condition. Interestingly, the expression levels of GPX1 and SELENOW were not significantly changed in the cartilage of *Selenop* KO mice compared to those of WT mice. Scale bar: 25  $\mu$ m.



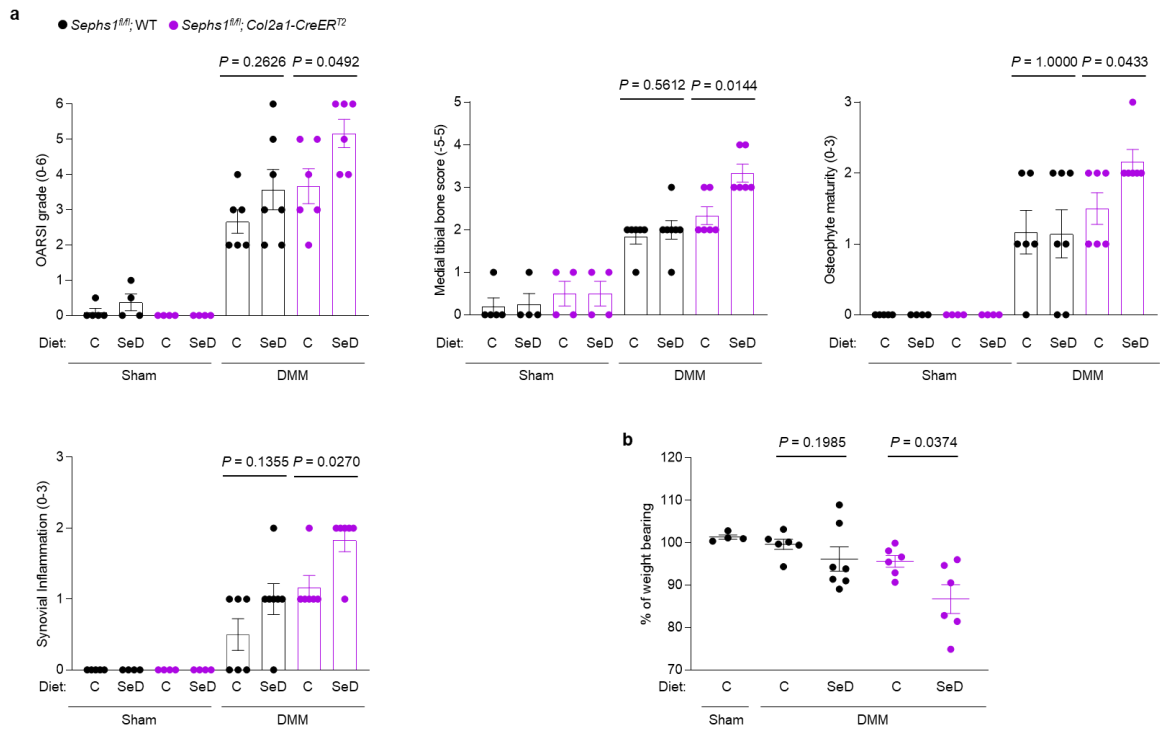

**Supplementary Fig. 8** A selenium-deficient diet exacerbates the progression of OA in *Sephs1*-iCKO mice, but has no effect on sham surgery in WT or *Sephs1*-iCKO mice. **a** Cartilage destruction, subchondral bone sclerosis, osteophyte formation, and synovial inflammation determined by safranin O/hematoxylin staining and scored ( $n = 5$  for sham-operated WT mice fed the control diet;  $n = 4$  for sham-operated WT mice fed the selenium-deficient diet;  $n = 4$  for sham-operated *Sephs1*-iCKO mice fed the control diet;  $n = 4$  for sham-operated *Sephs1*-iCKO mice fed the selenium-deficient diet;  $n = 6$  for DMM-operated WT fed the control diet;  $n = 7$  for DMM-operated WT mice fed the selenium-deficient diet;  $n = 6$  for DMM-operated *Sephs1*-iCKO mice fed the control diet;  $n = 6$  for DMM-operated *Sephs1*-iCKO mice fed the selenium-deficient diet). **b** Percentage of weight placed on the sham- or DMM-operated limb versus the contralateral limb over 15 min analyzed by a dynamic weight bearing test ( $n = 4, 6, 7, 6, 6$  respectively). **a, b** Data represent means  $\pm$  s.e.m.  $P$  values are from S-R-H test followed by Mann-Whitney  $U$  test (**a, b**).

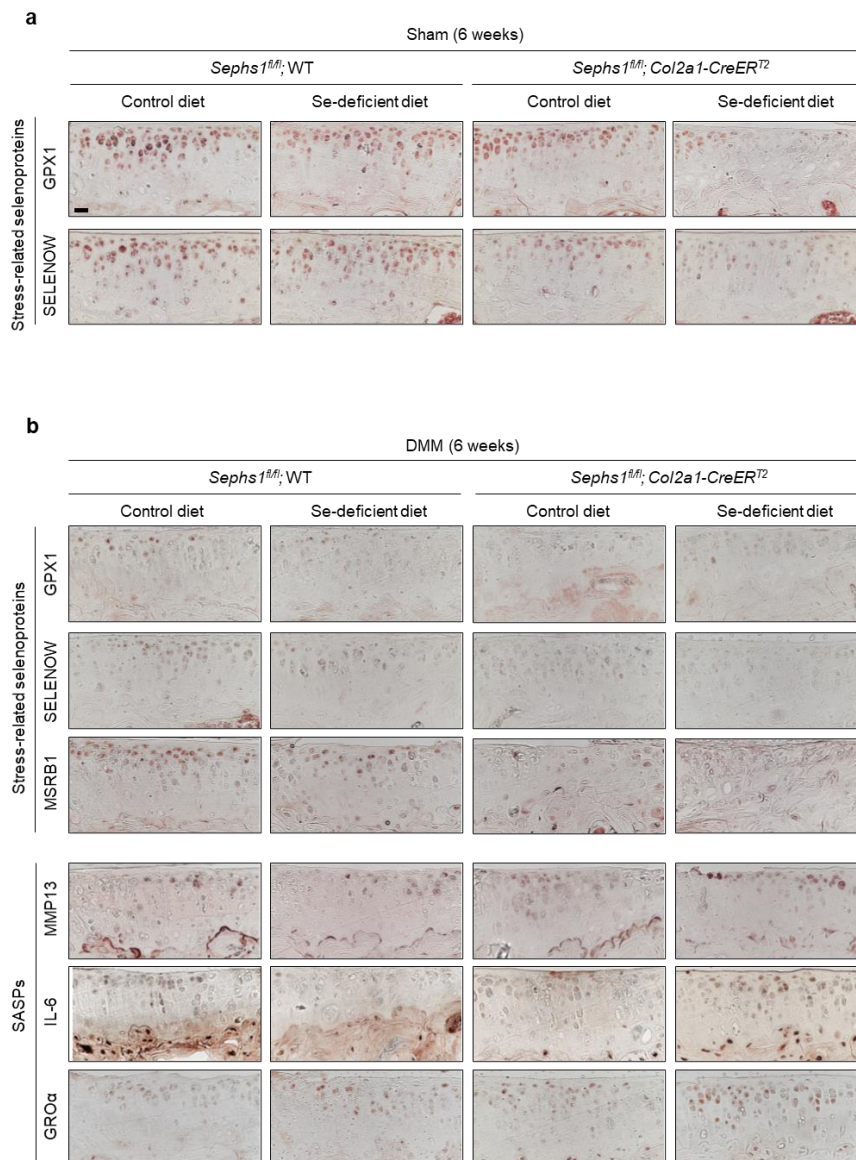

**Supplementary Fig. 9** Immunohistochemical staining of stress-related selenoproteins and SASPs in cartilage sections of WT and SEPHS1-deficient mice fed a normal or selenium-deficient diet. **a** Stress-related selenoproteins (GPX1 and SELENOW) were detected by immunohistochemistry in cartilage sections from the knee joints of sham-operated WT and *Sephs1*-iCKO mice fed the indicated diets. **b** Stress-related selenoproteins (GPX1, SELENOW, and MSRB1) and SASPs (MMP13, IL-6, and GRO $\alpha$ ) were detected by immunohistochemistry in cartilage sections from the knee joints of DMM-operated WT and *Sephs1*-iCKO mice fed the indicated diets. Scale bar: **a** 25  $\mu$ m.

**Fig. 2b**

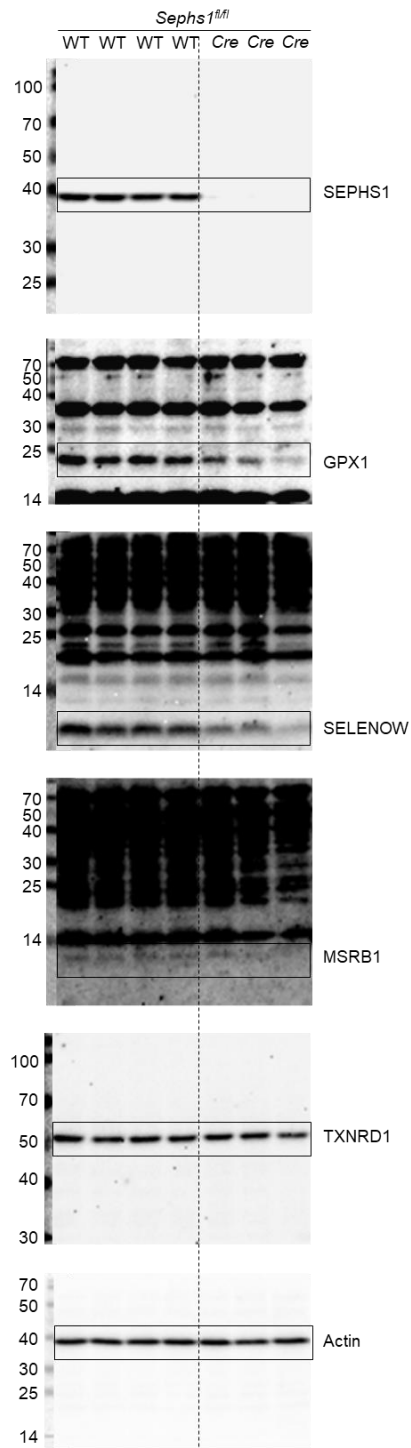

**Supplementary Fig. 10** Unprocessed immunoblot images.

**Fig. 3g**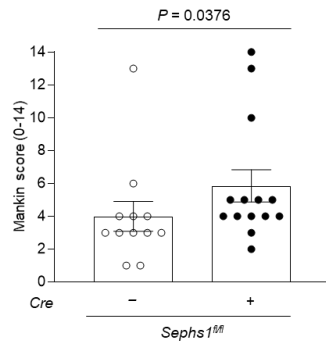**Fig. 4b**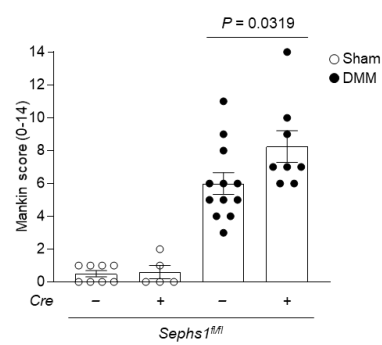**Fig. 5d**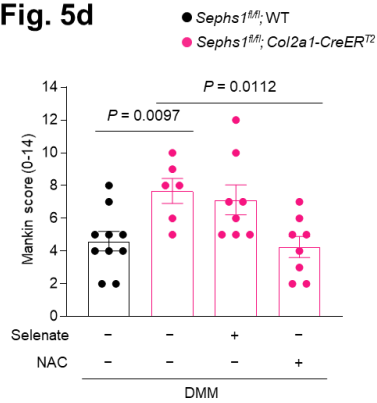**Fig. 6c**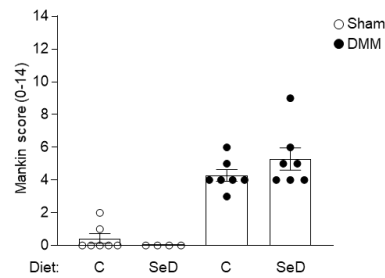**Fig. 6g**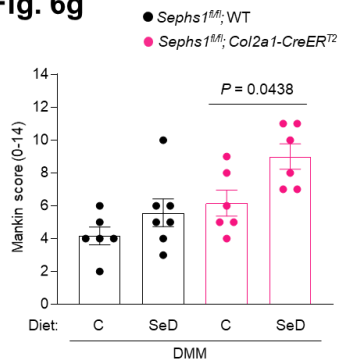

**Supplementary Fig. 11** Mankin scores of *in vivo* data. Data represent means  $\pm$  s.e.m. *P* values are from Mann–Whitney *U* test, Kruskal–Wallis test followed by Mann–Whitney *U* test, or S–R–H test followed by Mann–Whitney *U* test.

**Fig. 3g**

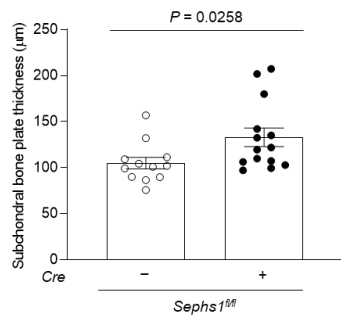

**Fig. 4b**

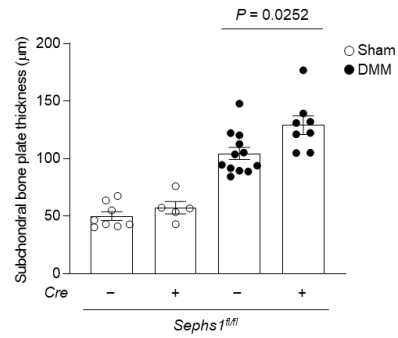

**Fig. 5d**

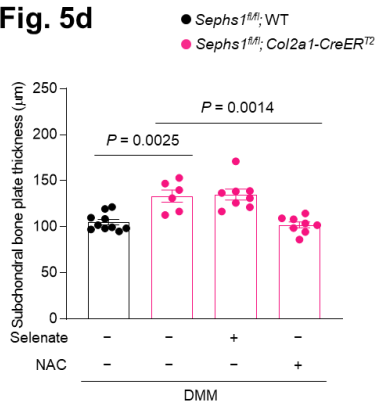

**Fig. 6c**

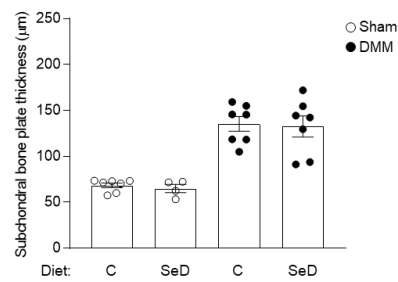

**Fig. 6g**

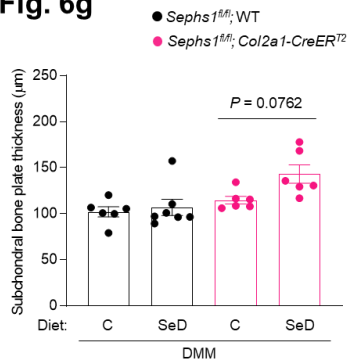

**Supplementary Fig. 12** Subchondral bone plate thickness of the medial tibial plateau in the mouse model of post-traumatic OA. Data represent means  $\pm$  s.e.m.  $P$  values are from  $t$  test or two-way ANOVA followed by Tukey's post-hoc test.

| (n = 22) | Sex       | Age (years) | Height (cm) | Weight (kg) | BMI (kg/m <sup>2</sup> ) |
|----------|-----------|-------------|-------------|-------------|--------------------------|
| Range    | 22 Female | 58–78       | 142.9–173.7 | 49.0–77.9   | 20.6–32.8                |
| Average  | -         | 68.4        | 152.8       | 63.7        | 27.3                     |
| SE       | -         | 1.16        | 1.31        | 1.77        | 0.66                     |

**Supplementary Table 1** Descriptive characteristics of patients with OA. Abbreviation: BMI, body mass index.

| Genes                                  | Strand | Primer sequences              |
|----------------------------------------|--------|-------------------------------|
| <i>Cre</i>                             | S      | 5'-GCGGTCTGGCAGTAAAACTATC-3'  |
|                                        | AS     | 5'-GTGAAACAGCATTGCTGTCACCT-3' |
| <i>Sephs1_floxed</i>                   | S      | 5'-GAGATGCGTTTGTGTCCTCC-3'    |
|                                        | AS     | 5'-AGTGAGTGCCCGCCTTTA-3'      |
| <i>Sephs1_recombination efficiency</i> | S      | 5'-CATCCTCCGTGATTCCCCTG-3'    |
|                                        | AS     | 5'-AACAGCTCCAGAAACTGCT-3'     |

**Supplementary Table 2** List of primers used for genotyping and validation of inducible knockout in *Sephs1* knockout mice. Abbreviations: S, sense strand; AS, antisense strand.

| Genes            | Strand | siRNA, miRNA, anti-miR sequences | Species |
|------------------|--------|----------------------------------|---------|
| <i>Sephs1</i> #1 | S      | 5'-GAGUGAUCCUGUUAUCCAAdTdT-3'    | Mouse   |
|                  | AS     | 5'-UUGGAU AACAGGAUCACUCdTdT-3'   |         |
| <i>Sephs1</i> #3 | S      | 5'-CGUAGUCAGAGGGUUGCAUdTdT-3'    | Mouse   |
|                  | AS     | 5'-AUGCAACCCUCUGACUACGdTdT-3'    |         |

**Supplementary Table 3** List of siRNAs. Abbreviations: S, sense strand; AS, antisense strand.



| Genes         | Strand | Primer sequences              | Species |
|---------------|--------|-------------------------------|---------|
| <i>Hprt</i>   | S      | 5'-AGTCCCAGCGTCGTGATTAG-3'    | Mouse   |
|               | AS     | 5'-GTATCCAACACTTCGAGAGGTC-3'  |         |
| <i>Igfbp7</i> | S      | 5'-CTCGCATCCAGCCACCTTAT-3'    | Mouse   |
|               | AS     | 5'-ATGGAAGGACCTTGCTCGC-3'     |         |
| <i>Mmp3</i>   | S      | 5'-TTGATGGGCCTGGAACAGTC-3'    | Mouse   |
|               | AS     | 5'-AGTCCTGAGAGATTTGCGCC-3'    |         |
| <i>Mmp10</i>  | S      | 5'-GTTCCCTGTGTTGTCTGTCTCTC-3' | Mouse   |
|               | AS     | 5'-TGTTGCTCTTCAGTATGTGTGT-3'  |         |
| <i>Mmp13</i>  | S      | 5'-TTCTTTGGCTTAGAGGTGACTG-3'  | Mouse   |
|               | AS     | 5'-ACTGCTTGTCAGGTTTCATC-3'    |         |
| <i>Mmp14</i>  | S      | 5'-GACATCTTCTTGGTGGCTGTG-3'   | Mouse   |
|               | AS     | 5'-CCCAGTGCTTATCTCCTTGA-3'    |         |
| <i>Sephs1</i> | S      | 5'-GAGAGTCCTTAAACCGGAG-3'     | Mouse   |
|               | AS     | 5'-GCAAGTATCCATCCCAATGC-3'    |         |
| <i>Vegfa</i>  | S      | 5'-ACTTTCTGCTCTCTTGGGTG-3'    | Mouse   |
|               | AS     | 5'-CTGGCTTTGTTCTGTCTTTCTT-3'  |         |

**Supplementary Table 4** List of primers used in PCR. Abbreviations: S, sense strand; AS, antisense strand.

| GO_Cellular senescence |               |                 |                |               |                 |                 |
|------------------------|---------------|-----------------|----------------|---------------|-----------------|-----------------|
| <i>ABL1</i>            | <i>CDKN2A</i> | <i>ING2</i>     | <i>MIR146A</i> | <i>NEK6</i>   | <i>PRMT6</i>    | <i>TERF2</i>    |
| <i>AKT3</i>            | <i>CDKN2B</i> | <i>KAT6A</i>    | <i>MIR17</i>   | <i>NSMCE2</i> | <i>RBL1</i>     | <i>TERT</i>     |
| <i>ARG2</i>            | <i>CGAS</i>   | <i>KIR2DL4</i>  | <i>MIR188</i>  | <i>NUAK1</i>  | <i>RSL1D1</i>   | <i>TP53</i>     |
| <i>ARNTL</i>           | <i>EEF1E1</i> | <i>KRAS</i>     | <i>MIR20B</i>  | <i>OPA1</i>   | <i>SIRT1</i>    | <i>TWIST1</i>   |
| <i>BCL2L12</i>         | <i>FBXO5</i>  | <i>MAGEA2</i>   | <i>MIR217</i>  | <i>PAWR</i>   | <i>SLC30A10</i> | <i>ULK3</i>     |
| <i>BCL6</i>            | <i>H2AFX</i>  | <i>MAGEA2B</i>  | <i>MIR22</i>   | <i>PLA2R1</i> | <i>SMC5</i>     | <i>VASH1</i>    |
| <i>BMPRIA</i>          | <i>HLA-G</i>  | <i>MAP2K1</i>   | <i>MIR34A</i>  | <i>PLK2</i>   | <i>SMC6</i>     | <i>WNT16</i>    |
| <i>C2orf40</i>         | <i>HMGA1</i>  | <i>MAP3K3</i>   | <i>MIR543</i>  | <i>PML</i>    | <i>SRF</i>      | <i>YPEL3</i>    |
| <i>CALR</i>            | <i>HMGA2</i>  | <i>MAPK14</i>   | <i>MIR590</i>  | <i>PNPT1</i>  | <i>TBX2</i>     | <i>ZKSCAN3</i>  |
| <i>CDK6</i>            | <i>HRAS</i>   | <i>MAPKAPK5</i> | <i>NAMPT</i>   | <i>PRKCD</i>  | <i>TBX3</i>     | <i>ZMPSTE24</i> |
| <i>CDKN1A</i>          | <i>ID2</i>    | <i>MIR10A</i>   | <i>NEK4</i>    | <i>PRKDC</i>  | <i>TERC</i>     | <i>ZNF277</i>   |

**Supplementary Table 5** Gene list of the 'GO\_Cellular senescence' gene set.

| Oxidative stress induced senescence (Reactome) |                  |                  |                   |                  |                 |               |
|------------------------------------------------|------------------|------------------|-------------------|------------------|-----------------|---------------|
| <i>AGO1</i>                                    | <i>EZH2</i>      | <i>HIST1H2BD</i> | <i>HIST1H3I</i>   | <i>HIST2H3C</i>  | <i>MAPK14</i>   | <i>RING1</i>  |
| <i>AGO3</i>                                    | <i>FOS</i>       | <i>HIST1H2BE</i> | <i>HIST1H3J</i>   | <i>HIST2H3D</i>  | <i>MAPK3</i>    | <i>RNF2</i>   |
| <i>AGO4</i>                                    | <i>H2AFB1</i>    | <i>HIST1H2BF</i> | <i>HIST1H4A</i>   | <i>HIST2H4A</i>  | <i>MAPK8</i>    | <i>RPS27A</i> |
| <i>BMI1</i>                                    | <i>H2AFJ</i>     | <i>HIST1H2BG</i> | <i>HIST1H4B</i>   | <i>HIST2H4B</i>  | <i>MAPK9</i>    | <i>SCMH1</i>  |
| <i>CBX2</i>                                    | <i>H2AFV</i>     | <i>HIST1H2BH</i> | <i>HIST1H4C</i>   | <i>HIST3H2BB</i> | <i>MAPKAPK2</i> | <i>SUZ12</i>  |
| <i>CBX4</i>                                    | <i>H2AFX</i>     | <i>HIST1H2BI</i> | <i>HIST1H4D</i>   | <i>HIST4H4</i>   | <i>MAPKAPK3</i> | <i>TFDP1</i>  |
| <i>CBX6</i>                                    | <i>H2AFZ</i>     | <i>HIST1H2BJ</i> | <i>HIST1H4E</i>   | <i>IFNB1</i>     | <i>MAPKAPK5</i> | <i>TFDP2</i>  |
| <i>CBX8</i>                                    | <i>H2BFS</i>     | <i>HIST1H2BK</i> | <i>HIST1H4F</i>   | <i>JUN</i>       | <i>MDM2</i>     | <i>TNIK</i>   |
| <i>CDK4</i>                                    | <i>H3F3A</i>     | <i>HIST1H2BL</i> | <i>HIST1H4H</i>   | <i>KDM6B</i>     | <i>MDM4</i>     | <i>TNRC6A</i> |
| <i>CDK6</i>                                    | <i>H3F3B</i>     | <i>HIST1H2BM</i> | <i>HIST1H4I</i>   | <i>MAP2K3</i>    | <i>MINK1</i>    | <i>TNRC6B</i> |
| <i>CDKN2A</i>                                  | <i>HIST1H2AB</i> | <i>HIST1H2BN</i> | <i>HIST1H4J</i>   | <i>MAP2K4</i>    | <i>MIR24-1</i>  | <i>TNRC6C</i> |
| <i>CDKN2B</i>                                  | <i>HIST1H2AC</i> | <i>HIST1H2BO</i> | <i>HIST1H4K</i>   | <i>MAP2K6</i>    | <i>MIR24-2</i>  | <i>TP53</i>   |
| <i>CDKN2C</i>                                  | <i>HIST1H2AD</i> | <i>HIST1H3A</i>  | <i>HIST1H4L</i>   | <i>MAP2K7</i>    | <i>MOV10</i>    | <i>TXN</i>    |
| <i>CDKN2D</i>                                  | <i>HIST1H2AE</i> | <i>HIST1H3D</i>  | <i>HIST2H2AA3</i> | <i>MAP3K5</i>    | <i>PHC1</i>     | <i>UBA52</i>  |
| <i>E2F1</i>                                    | <i>HIST1H2AJ</i> | <i>HIST1H3E</i>  | <i>HIST2H2AA4</i> | <i>MAP4K4</i>    | <i>PHC2</i>     | <i>UBB</i>    |
| <i>E2F2</i>                                    | <i>HIST1H2BA</i> | <i>HIST1H3F</i>  | <i>HIST2H2AC</i>  | <i>MAPK1</i>     | <i>PHC3</i>     | <i>UBC</i>    |
| <i>E2F3</i>                                    | <i>HIST1H2BB</i> | <i>HIST1H3G</i>  | <i>HIST2H2BE</i>  | <i>MAPK10</i>    | <i>RBBP4</i>    |               |
| <i>EED</i>                                     | <i>HIST1H2BC</i> | <i>HIST1H3H</i>  | <i>HIST2H3A</i>   | <i>MAPK11</i>    | <i>RBBP7</i>    |               |

**Supplementary Table 6** Gene list of the ‘Reactome\_Oxidative stress induced senescence’ gene set.

## Upregulated genes in OA

|                    |                |                |                 |                |                      |                  |
|--------------------|----------------|----------------|-----------------|----------------|----------------------|------------------|
| <i>ABHD2</i>       | <i>CCND1</i>   | <i>ENOX1</i>   | <i>ID2</i>      | <i>MYBL1</i>   | <i>RAP2B</i>         | <i>STXBP6</i>    |
| <i>ABI3BP</i>      | <i>CCNE2</i>   | <i>EPDR1</i>   | <i>IER3</i>     | <i>MYC</i>     | <i>RARB</i>          | <i>SYN1</i>      |
| <i>ABRACL</i>      | <i>CCNYL1</i>  | <i>EPHA3</i>   | <i>IGF2BP2</i>  | <i>MYO1B</i>   | <i>RARRES1</i>       | <i>SYNDIG1</i>   |
| <i>AC005082.12</i> | <i>CD163L1</i> | <i>ESPL1</i>   | <i>IGFBP3</i>   | <i>NAV3</i>    | <i>RASGEF1B</i>      | <i>SYT11</i>     |
| <i>AC007362.1</i>  | <i>CD300C</i>  | <i>ESRRA</i>   | <i>IGFBP4</i>   | <i>NBL1</i>    | <i>RCAN1</i>         | <i>SYTL2</i>     |
| <i>AC009299.3</i>  | <i>CD55</i>    | <i>ETV4</i>    | <i>IGFBP7</i>   | <i>NCAPG</i>   | <i>RGCC</i>          | <i>TACSTD2</i>   |
| <i>AC074093.1</i>  | <i>CD58</i>    | <i>EVA1A</i>   | <i>IGSF3</i>    | <i>NCF2</i>    | <i>RHBDL2</i>        | <i>TAGLN2</i>    |
| <i>AC093850.2</i>  | <i>CD68</i>    | <i>EVI2A</i>   | <i>IL11</i>     | <i>NEDD4L</i>  | <i>RHPN2</i>         | <i>TAGLN2P1</i>  |
| <i>AC144831.1</i>  | <i>CDC20</i>   | <i>EVI2B</i>   | <i>IL13RA2</i>  | <i>NEDD9</i>   | <i>RIPK3</i>         | <i>TBC1D7</i>    |
| <i>ADAM12</i>      | <i>CDC6</i>    | <i>EVL</i>     | <i>IL8</i>      | <i>NETO2</i>   | <i>RIPK4</i>         | <i>TBC1D9</i>    |
| <i>ADAM9</i>       | <i>CDH10</i>   | <i>EYA4</i>    | <i>INHBA</i>    | <i>NFIL3</i>   | <i>RND1</i>          | <i>TBX3</i>      |
| <i>ADAMTS1</i>     | <i>CDH19</i>   | <i>EZR</i>     | <i>INHBB</i>    | <i>NFKBIZ</i>  | <i>RND3</i>          | <i>TBX5</i>      |
| <i>ADAMTS12</i>    | <i>CDH2</i>    | <i>F11R</i>    | <i>IQGAP3</i>   | <i>NGF</i>     | <i>RNF128</i>        | <i>TBX5-ASI</i>  |
| <i>ADAMTS14</i>    | <i>CDK1</i>    | <i>F13A1</i>   | <i>IRX2</i>     | <i>NKX2-5</i>  | <i>RNF152</i>        | <i>TCAIM</i>     |
| <i>ADAMTS5</i>     | <i>CDK6</i>    | <i>F2R</i>     | <i>IRX5</i>     | <i>NOS2</i>    | <i>RNF180</i>        | <i>TCEAL7</i>    |
| <i>ADAMTS6</i>     | <i>CDKN1A</i>  | <i>F3</i>      | <i>ISG15</i>    | <i>NOVA1</i>   | <i>RNPEPL1</i>       | <i>TCIRG1</i>    |
| <i>ADTRP</i>       | <i>CDKN2B</i>  | <i>FAM111B</i> | <i>ISM2</i>     | <i>NPR3</i>    | <i>ROR1</i>          | <i>TENM2</i>     |
| <i>AFAP1L1</i>     | <i>CDKN3</i>   | <i>FAM126A</i> | <i>ITGA3</i>    | <i>NPTX2</i>   | <i>RP11-143E21.7</i> | <i>TENM3</i>     |
| <i>AGXT2L1</i>     | <i>CELF2</i>   | <i>FAM132B</i> | <i>ITGA4</i>    | <i>NRIP3</i>   | <i>RP11-150O12.1</i> | <i>TES</i>       |
| <i>AHR</i>         | <i>CENPE</i>   | <i>FAM134B</i> | <i>ITGA9</i>    | <i>NRP2</i>    | <i>RP11-160A10.2</i> | <i>TFPI</i>      |
| <i>AKR1C1</i>      | <i>CENPF</i>   | <i>FAM167A</i> | <i>ITGAX</i>    | <i>NT5E</i>    | <i>RP11-18F14.2</i>  | <i>TFPI2</i>     |
| <i>AKR1C2</i>      | <i>CENPH</i>   | <i>FAM173B</i> | <i>ITGB4</i>    | <i>NTF3</i>    | <i>RP11-215A21.2</i> | <i>TGFBI</i>     |
| <i>AKR1C3</i>      | <i>CENPK</i>   | <i>FAM180A</i> | <i>ITGB5</i>    | <i>NTRK2</i>   | <i>RP11-267A15.1</i> | <i>TGFBR1</i>    |
| <i>ALI39147.1</i>  | <i>CENPP</i>   | <i>FAM60A</i>  | <i>ITPR1</i>    | <i>NUDT11</i>  | <i>RP11-282K24.1</i> | <i>THY1</i>      |
| <i>ALDH3B1</i>     | <i>CEP55</i>   | <i>FAM89B</i>  | <i>KAZN</i>     | <i>NUSAP1</i>  | <i>RP11-316P21.1</i> | <i>TIMP3</i>     |
| <i>ALS2CL</i>      | <i>CGRRF1</i>  | <i>FANCI</i>   | <i>KCNA1</i>    | <i>NXPE2</i>   | <i>RP11-350G8.3</i>  | <i>TLR6</i>      |
| <i>ALS2CR11</i>    | <i>CHML</i>    | <i>FAP</i>     | <i>KCNE4</i>    | <i>OCIAD2</i>  | <i>RP11-363J20.2</i> | <i>TM4SF1</i>    |
| <i>AMPH</i>        | <i>CHRD</i>    | <i>FAT3</i>    | <i>KCNG2</i>    | <i>ODF3B</i>   | <i>RP11-383H13.1</i> | <i>TMEM100</i>   |
| <i>ANGPTL1</i>     | <i>CHST13</i>  | <i>FBLN2</i>   | <i>KCNN4</i>    | <i>OGN</i>     | <i>RP11-456H18.2</i> | <i>TMEM119</i>   |
| <i>ANK3</i>        | <i>CHST15</i>  | <i>FBXO16</i>  | <i>KCNS3</i>    | <i>OLFML2B</i> | <i>RP11-536I6.2</i>  | <i>TMEM126A</i>  |
| <i>ANKRD44</i>     | <i>CITED4</i>  | <i>FGF9</i>    | <i>KIAA1217</i> | <i>OMD</i>     | <i>RP11-556K13.1</i> | <i>TMEM150C</i>  |
| <i>ANKRD9</i>      | <i>CKAP2</i>   | <i>FHL2</i>    | <i>KIAA1244</i> | <i>OPN3</i>    | <i>RP11-73E17.2</i>  | <i>TMEM154</i>   |
| <i>ANLN</i>        | <i>CKAP2L</i>  | <i>FN1</i>     | <i>KIF11</i>    | <i>ORMDL2</i>  | <i>RP11-841C19.6</i> | <i>TMEM200A</i>  |
| <i>ANO5</i>        | <i>CKB</i>     | <i>FNDC1</i>   | <i>KIF18A</i>   | <i>OSBPL3</i>  | <i>RP2</i>           | <i>TMEM59L</i>   |
| <i>ANPEP</i>       | <i>CKS2</i>    | <i>FNIP2</i>   | <i>KIF20A</i>   | <i>OSTC</i>    | <i>RPL22L1</i>       | <i>TMOD1</i>     |
| <i>ANXA1</i>       | <i>CLCF1</i>   | <i>FOSL1</i>   | <i>KIF23</i>    | <i>OTUD1</i>   | <i>RPL29P33</i>      | <i>TMOD3</i>     |
| <i>ANXA8</i>       | <i>CLDN1</i>   | <i>FOXF1</i>   | <i>KIF5C</i>    | <i>P4HA3</i>   | <i>RPSAP4</i>        | <i>TMSB4X</i>    |
| <i>ANXA8L1</i>     | <i>CLDN7</i>   | <i>FOXMI</i>   | <i>KIFC1</i>    | <i>PAMR1</i>   | <i>RPSAP58</i>       | <i>TMSB4XP1</i>  |
| <i>ANXA8L2</i>     | <i>CLIC3</i>   | <i>FRMD6</i>   | <i>KL</i>       | <i>PAPPA</i>   | <i>RRM2</i>          | <i>TMSB4XP2</i>  |
| <i>AOC2</i>        | <i>CLIC6</i>   | <i>FRRS1</i>   | <i>KLF6</i>     | <i>PARP8</i>   | <i>RTN2</i>          | <i>TMSB4XP6</i>  |
| <i>AOC3</i>        | <i>CNIH</i>    | <i>FSTL1</i>   | <i>KLF7</i>     | <i>PAWR</i>    | <i>SI00A2</i>        | <i>TMSB4XP8</i>  |
| <i>AP000330.8</i>  | <i>CNKS2</i>   | <i>FSTL3</i>   | <i>KLF9</i>     | <i>PAX1</i>    | <i>SI00A3</i>        | <i>TNFAIP6</i>   |
| <i>APCDD1L</i>     | <i>CNTN1</i>   | <i>FTCD</i>    | <i>KLHL35</i>   | <i>PBK</i>     | <i>SI00A4</i>        | <i>TNFRSF11A</i> |
| <i>APOBEC3C</i>    | <i>COL13A1</i> | <i>FZD1</i>    | <i>KLHL5</i>    | <i>PCDH1</i>   | <i>SI00A6</i>        | <i>TNFRSF11B</i> |

|                  |                      |                |                  |                 |                 |                  |
|------------------|----------------------|----------------|------------------|-----------------|-----------------|------------------|
| <i>AQP1</i>      | <i>COL15A1</i>       | <i>FZD10</i>   | <i>KLRD1</i>     | <i>PCDH10</i>   | <i>SIPR3</i>    | <i>TNFRSF12A</i> |
| <i>ARG2</i>      | <i>COL18A1</i>       | <i>FZD3</i>    | <i>KPNA2</i>     | <i>PCDH18</i>   | <i>SAMD9</i>    | <i>TNFSF10</i>   |
| <i>ARHGAP11A</i> | <i>COL1A1</i>        | <i>GADD45B</i> | <i>LACC1</i>     | <i>PCSK5</i>    | <i>SCD5</i>     | <i>TNFSF11</i>   |
| <i>ARHGAP24</i>  | <i>COL22A1</i>       | <i>GALNT12</i> | <i>LAMA5</i>     | <i>PDE10A</i>   | <i>SCO2</i>     | <i>TNNI2</i>     |
| <i>ARHGAP28</i>  | <i>COL24A1</i>       | <i>GALNT13</i> | <i>LAMB3</i>     | <i>PDGFA</i>    | <i>SCXA</i>     | <i>TOM1L1</i>    |
| <i>ARHGAP44</i>  | <i>COL25A1</i>       | <i>GALNT16</i> | <i>LAMC2</i>     | <i>PDGFC</i>    | <i>SCXB</i>     | <i>TOP2A</i>     |
| <i>ARHGAP9</i>   | <i>COL5A3</i>        | <i>GALNT7</i>  | <i>LANCL3</i>    | <i>PDLIM7</i>   | <i>SDK1</i>     | <i>TPX2</i>      |
| <i>ARID5B</i>    | <i>COL6A3</i>        | <i>GAS1</i>    | <i>LEFTY2</i>    | <i>PERP</i>     | <i>SEMA3C</i>   | <i>TRAK1</i>     |
| <i>ARL4A</i>     | <i>COL7A1</i>        | <i>GAS2L3</i>  | <i>LEPREL1</i>   | <i>PGM2L1</i>   | <i>SEMA4D</i>   | <i>TREM1</i>     |
| <i>ARL4C</i>     | <i>COL8A1</i>        | <i>GDF6</i>    | <i>LHX9</i>      | <i>PGR</i>      | <i>SEMA5A</i>   | <i>TRIM36</i>    |
| <i>ARNTL2</i>    | <i>COL8A2</i>        | <i>GFRA2</i>   | <i>LIF</i>       | <i>PHLDA2</i>   | <i>SERINC2</i>  | <i>TRPM8</i>     |
| <i>ARSI</i>      | <i>CORO1C</i>        | <i>GGH</i>     | <i>LINC00152</i> | <i>PI4K2B</i>   | <i>SERPINB8</i> | <i>TSC22D3</i>   |
| <i>ASAP2</i>     | <i>CPEB2</i>         | <i>GINS2</i>   | <i>LINC00467</i> | <i>PIM1</i>     | <i>SERPINE1</i> | <i>TSPAN12</i>   |
| <i>ASPM</i>      | <i>CRLF1</i>         | <i>GINS4</i>   | <i>LINC00517</i> | <i>PITPNM3</i>  | <i>SERPINE2</i> | <i>TSPAN2</i>    |
| <i>ASPN</i>      | <i>CRNDE</i>         | <i>GIPR</i>    | <i>LINC00545</i> | <i>PLAT</i>     | <i>SERPINF1</i> | <i>TSTD1</i>     |
| <i>ATAD5</i>     | <i>CRTAC1</i>        | <i>GJA1</i>    | <i>LINC00607</i> | <i>PLAUR</i>    | <i>SERTAD1</i>  | <i>TTC9</i>      |
| <i>ATP6AP2</i>   | <i>CSDC2</i>         | <i>GJB2</i>    | <i>LMNB1</i>     | <i>PLD1</i>     | <i>SGK1</i>     | <i>TTK</i>       |
| <i>ATRNLI</i>    | <i>CSRNP1</i>        | <i>GJC1</i>    | <i>LMO2</i>      | <i>PLEKHF2</i>  | <i>SGMS2</i>    | <i>TUBA1A</i>    |
| <i>B3GNT2</i>    | <i>CTC-298B17.1</i>  | <i>GLIS1</i>   | <i>LMX1B</i>     | <i>PLEKHG1</i>  | <i>SGOL2</i>    | <i>TYMP</i>      |
| <i>B3GNT5</i>    | <i>CTD-2319I12.1</i> | <i>GLIS3</i>   | <i>LOXL1</i>     | <i>PLK4</i>     | <i>SH3KBP1</i>  | <i>TYMS</i>      |
| <i>BAALC</i>     | <i>CXCR7</i>         | <i>GLP2R</i>   | <i>LRRRC8B</i>   | <i>PLS3</i>     | <i>SHC4</i>     | <i>TYRO3</i>     |
| <i>BACH1</i>     | <i>CXorf57</i>       | <i>GLRB</i>    | <i>LRRRC8C</i>   | <i>PLXNA2</i>   | <i>SHCBP1</i>   | <i>UAP1</i>      |
| <i>BAG2</i>      | <i>CYB5R4</i>        | <i>GLRX</i>    | <i>LRRRC8E</i>   | <i>PLXNA4</i>   | <i>SIK1</i>     | <i>UBAC2</i>     |
| <i>BARX2</i>     | <i>CYFIP2</i>        | <i>GLRX3</i>   | <i>LRRFIP1</i>   | <i>PMAIP1</i>   | <i>SIPA1L2</i>  | <i>UBE2D1</i>    |
| <i>BCAS4</i>     | <i>CYP27B1</i>       | <i>GLYATL2</i> | <i>LTBP4</i>     | <i>PNMA2</i>    | <i>SIX1</i>     | <i>UBE2T</i>     |
| <i>BDNF</i>      | <i>DBNDD1</i>        | <i>GMNN</i>    | <i>LUM</i>       | <i>PNP</i>      | <i>SKAP2</i>    | <i>UGP2</i>      |
| <i>BIRC5</i>     | <i>DDHD1</i>         | <i>GNAI1</i>   | <i>LY6D</i>      | <i>PODXL</i>    | <i>SLC16A10</i> | <i>UHRF1</i>     |
| <i>BIRC7</i>     | <i>DENND3</i>        | <i>GNG11</i>   | <i>LY96</i>      | <i>PODXL2</i>   | <i>SLC24A3</i>  | <i>ULBP1</i>     |
| <i>BMP2K</i>     | <i>DEPDC1</i>        | <i>GNPNAT1</i> | <i>LYPLA1</i>    | <i>POPDC3</i>   | <i>SLC2A12</i>  | <i>ULBP2</i>     |
| <i>BMPR1B</i>    | <i>DGKI</i>          | <i>GPC4</i>    | <i>MAD2L1</i>    | <i>POSTN</i>    | <i>SLC2A5</i>   | <i>UPK1B</i>     |
| <i>BPGM</i>      | <i>DIAPH3</i>        | <i>GPM6B</i>   | <i>MAGED4B</i>   | <i>PPP1R14C</i> | <i>SLC30A1</i>  | <i>UROCI</i>     |
| <i>BRCA2</i>     | <i>DIRAS1</i>        | <i>GPR176</i>  | <i>MAMDC2</i>    | <i>PPP1R36</i>  | <i>SLC31A2</i>  | <i>VANGL1</i>    |
| <i>BTBD16</i>    | <i>DIXDC1</i>        | <i>GPR183</i>  | <i>MAP1A</i>     | <i>PPTC7</i>    | <i>SLC35E4</i>  | <i>VCAN</i>      |
| <i>BUB1</i>      | <i>DKK3</i>          | <i>GPR56</i>   | <i>MAP1B</i>     | <i>PQLC3</i>    | <i>SLC38A5</i>  | <i>VEGFC</i>     |
| <i>BUB1B</i>     | <i>DLGAP5</i>        | <i>GPR64</i>   | <i>MAP7</i>      | <i>PRC1</i>     | <i>SLC39A14</i> | <i>VEPH1</i>     |
| <i>BVES</i>      | <i>DLX4</i>          | <i>GRIA2</i>   | <i>MAPKAPK3</i>  | <i>PRDMI</i>    | <i>SLC41A2</i>  | <i>VPS13A</i>    |
| <i>BZW2</i>      | <i>DNAJC12</i>       | <i>GRIP1</i>   | <i>MARC2</i>     | <i>PREX2</i>    | <i>SLC44A5</i>  | <i>VSIG2</i>     |
| <i>C10orf105</i> | <i>DNAJC22</i>       | <i>GSKIP</i>   | <i>MARCKS</i>    | <i>PRKAR2B</i>  | <i>SLC4A7</i>   | <i>VSNL1</i>     |
| <i>C11orf82</i>  | <i>DNER</i>          | <i>GTDC1</i>   | <i>MARS2</i>     | <i>PROCR</i>    | <i>SLC6A6</i>   | <i>VWC2</i>      |
| <i>C12orf5</i>   | <i>DOK6</i>          | <i>H2AFZ</i>   | <i>MBP</i>       | <i>PRSS23</i>   | <i>SLC7A2</i>   | <i>WDR69</i>     |
| <i>C1GALT1</i>   | <i>DOPEY2</i>        | <i>HBA2</i>    | <i>MELK</i>      | <i>PSAT1</i>    | <i>SLC7A5</i>   | <i>WISP1</i>     |
| <i>C1GALT1C1</i> | <i>DPP4</i>          | <i>HBB</i>     | <i>MEOX2</i>     | <i>PTGER1</i>   | <i>SLFN11</i>   | <i>WNT16</i>     |
| <i>C1orf114</i>  | <i>DSG2</i>          | <i>HEBP2</i>   | <i>MET</i>       | <i>PTGER2</i>   | <i>SLITRK6</i>  | <i>WNT5A</i>     |
| <i>C1QTNF1</i>   | <i>DTL</i>           | <i>HEG1</i>    | <i>MEX3D</i>     | <i>PTGER4</i>   | <i>SLMO2</i>    | <i>WNT5B</i>     |
| <i>C1QTNF2</i>   | <i>DUSP4</i>         | <i>HES6</i>    | <i>MFSD6</i>     | <i>PTGES</i>    | <i>SMIM5</i>    | <i>WNT7B</i>     |

|                 |                  |                 |                |                 |                   |                   |
|-----------------|------------------|-----------------|----------------|-----------------|-------------------|-------------------|
| <i>C1QTNF3</i>  | <i>DUSP5</i>     | <i>HEY2</i>     | <i>MICAL2</i>  | <i>PTGFR</i>    | <i>SNHG5</i>      | <i>WNT9A</i>      |
| <i>C1QTNF7</i>  | <i>DUSP6</i>     | <i>HHIPL1</i>   | <i>MINOS1</i>  | <i>PTGS2</i>    | <i>SNTB1</i>      | <i>YRDC</i>       |
| <i>C3orf14</i>  | <i>DUSP8</i>     | <i>HJURP</i>    | <i>MIR31HG</i> | <i>PTPRD</i>    | <i>SNX10</i>      | <i>YY2</i>        |
| <i>C3orf52</i>  | <i>DYNLT3</i>    | <i>HMCN1</i>    | <i>MKI67</i>   | <i>PTPRK</i>    | <i>SNX7</i>       | <i>ZBTB21</i>     |
| <i>C4orf48</i>  | <i>DYSF</i>      | <i>HMGA1</i>    | <i>MLF1IP</i>  | <i>PTTG1</i>    | <i>SOD2</i>       | <i>ZDHHC2</i>     |
| <i>C5orf38</i>  | <i>E2F1</i>      | <i>HMGA2</i>    | <i>MMP28</i>   | <i>PTX3</i>     | <i>SORBS2</i>     | <i>ZIC1</i>       |
| <i>C6orf132</i> | <i>EAF2</i>      | <i>HMGB3P10</i> | <i>MOB3B</i>   | <i>PXDN</i>     | <i>SORT1</i>      | <i>ZIC4</i>       |
| <i>CA12</i>     | <i>EBF3</i>      | <i>HMMR</i>     | <i>MOXD1</i>   | <i>QPCT</i>     | <i>SOWAHC</i>     | <i>ZNF277</i>     |
| <i>CACHD1</i>   | <i>ECT2</i>      | <i>HOMER2</i>   | <i>MPP7</i>    | <i>R3HDML</i>   | <i>SOX11</i>      | <i>ZNF365</i>     |
| <i>CACNA1A</i>  | <i>EDEM2</i>     | <i>HOXB2</i>    | <i>MSC</i>     | <i>RAB23</i>    | <i>SPAG1</i>      | <i>ZNF367</i>     |
| <i>CAPS</i>     | <i>EDNRA</i>     | <i>HOXB-AS1</i> | <i>MSX2</i>    | <i>RAB31</i>    | <i>SPECC1</i>     | <i>ZNF503-AS1</i> |
| <i>CASC5</i>    | <i>EEF1A1P12</i> | <i>HPSE2</i>    | <i>MT1A</i>    | <i>RAB32</i>    | <i>SPINT1</i>     | <i>ZNF544</i>     |
| <i>CASP4</i>    | <i>EEF1A1P33</i> | <i>HS3ST2</i>   | <i>MT1F</i>    | <i>RAB38</i>    | <i>SPRY1</i>      | <i>ZNF883</i>     |
| <i>CBR3</i>     | <i>EEF1E1</i>    | <i>HSD17B11</i> | <i>MT1G</i>    | <i>RAB1F</i>    | <i>SPSB4</i>      | <i>ZWILCH</i>     |
| <i>CCDC109B</i> | <i>EFHD2</i>     | <i>HSD3B7</i>   | <i>MT1L</i>    | <i>RAC2</i>     | <i>SQRDL</i>      | <i>ZWINT</i>      |
| <i>CCDC112</i>  | <i>EGR2</i>      | <i>HSPB8</i>    | <i>MT1M</i>    | <i>RACGAP1</i>  | <i>ST3GAL1</i>    |                   |
| <i>CCL20</i>    | <i>EHD4</i>      | <i>HTRA1</i>    | <i>MTHFD1L</i> | <i>RAD51</i>    | <i>ST6GAL2</i>    |                   |
| <i>CCNB1</i>    | <i>ELMO1</i>     | <i>HUNK</i>     | <i>MTSS1</i>   | <i>RAD51AP2</i> | <i>ST6GALNAC5</i> |                   |
| <i>CCNB2</i>    | <i>EMP1</i>      | <i>ICA1</i>     | <i>MUC12</i>   | <i>RAI14</i>    | <i>STX1A</i>      |                   |

**Supplementary Table 7** Gene list of the ‘Upregulated genes in OA’ gene set<sup>30</sup>.

| Fig. | Measure                  | Groups compared<br>(control vs. experimental) | Mean<br>difference | Pooled<br>SD | Cohen's <i>d</i><br>(magnitude) | 95% CI of<br>difference<br>between means |
|------|--------------------------|-----------------------------------------------|--------------------|--------------|---------------------------------|------------------------------------------|
| 1b   | OARSI grade              | Undamaged vs. Damaged                         | 2.318              | 0.798        | 2.904<br>(huge)                 | 2.526 to 3.281                           |
| 1e   | OARSI grade              | 2-month-old vs. 24-month-old                  | 2.250              | 0.53         | 4.243<br>(huge)                 | 1.206 to 7.279                           |
| 1f   | OARSI grade              | Sham vs. DMM                                  | 3.389              | 0.894        | 3.791<br>(huge)                 | 2.156 to 5.426                           |
| 3g   | OARSI grade              | WT vs. iCKO                                   | 1.030              | 1.667        | 0.618<br>(medium)               | 0.283 to 0.952                           |
|      | Medial tibial bone score | WT vs. iCKO                                   | 1.595              | 1.252        | 1.275<br>(very large)           | 0.891 to 1.658                           |
|      | Osteophyte maturity      | WT vs. iCKO                                   | 0.798              | 0.744        | 1.073<br>(large)                | 0.707 to 1.438                           |
|      | Synovial inflammation    | WT vs. iCKO                                   | 0.452              | 0.613        | 0.738<br>(medium)               | 0.397 to 1.079                           |
| 4b   | OARSI grade              | DMM WT vs. DMM iCKO                           | 1.708              | 1.197        | 1.427<br>(very large)           | 0.882 to 1.972                           |
|      | Medial tibial bone score | DMM WT vs. DMM iCKO                           | 1.250              | 1.007        | 1.241<br>(very large)           | 0.722 to 1.760                           |
|      | Osteophyte maturity      | DMM WT vs. DMM iCKO                           | 0.792              | 0.728        | 1.087<br>(large)                | 0.588 to 1.587                           |
|      | Synovial inflammation    | DMM WT vs. DMM iCKO                           | 0.792              | 0.728        | 1.087<br>(large)                | 0.588 to 1.587                           |
| 5d   | OARSI grade              | WT vs. iCKO                                   | 1.533              | 0.799        | 1.920<br>(very large)           | 1.101 to 2.739                           |
|      | Medial tibial bone score | WT vs. iCKO                                   | 1.767              | 0.935        | 1.890<br>(very large)           | 1.079 to 2.701                           |
|      | Osteophyte maturity      | WT vs. iCKO                                   | 1.267              | 0.834        | 1.519<br>(very large)           | 0.792 to 2.246                           |
|      | Synovial inflammation    | WT vs. iCKO                                   | 0.800              | 0.507        | 1.578<br>(very large)           | 0.839 to 2.316                           |
|      | OARSI grade              | iCKO vs. iCKO+NAC                             | -1.333             | 0.882        | -1.512<br>(very large)          | -2.325 to -0.698                         |
|      | Medial tibial bone score | iCKO vs. iCKO+NAC                             | -1.292             | 1.049        | -1.231<br>(very large)          | -1.985 to -0.478                         |
|      | Osteophyte maturity      | iCKO vs. iCKO+NAC                             | -1.417             | 0.833        | -1.700<br>(very large)          | -2.560 to -0.840                         |
|      | Synovial inflammation    | iCKO vs. iCKO+NAC                             | -1.000             | 0.540        | -1.852<br>(very large)          | -2.754 to 0.949                          |
| 6g   | OARSI grade              | DMM iCKO C vs. DMM iCKO<br>SeD                | 1.500              | 1.103        | 1.360<br>(very large)           | 0.446 to 2.274                           |
|      | Medial tibial bone score | DMM iCKO C vs. DMM iCKO<br>SeD                | 1.000              | 0.516        | 1.936<br>(very large)           | 0.846 to 3.027                           |
|      | Osteophyte maturity      | DMM iCKO C vs. DMM iCKO<br>SeD                | 0.667              | 0.483        | 1.380<br>(very large)           | 0.461 to 2.300                           |
|      | Synovial inflammation    | DMM iCKO C vs. DMM iCKO<br>SeD                | 0.667              | 0.408        | 1.633<br>(very large)           | 0.643 to 2.623                           |

**Supplementary Table 8** Cohen's *d* effect size measurements of statistically significant changes observed from *in vivo* data scored based on ordinal scoring systems. Abbreviation: CI, confidence interval.



**Supplementary Note 1** The detailed results of statistical analyses using *t* test and two-way ANOVA, referring to Fig. 2a, k, l, m, Fig. 5b, and Supplementary Fig. 4c.

The details of statistical analyses for Fig. 2a, k, l, m, Fig. 5b, and Supplementary Fig. 4c are summarized in this file.

**Fig. 2a** Relative mRNA expression level of *Sephs1* in primary cultured chondrocytes isolated from *Sephs1<sup>fl/fl</sup>* or *Sephs1<sup>fl/fl</sup>; Col2a1-Cre* mice (*n* = 4).

| Two independent sample <i>t</i> test (equal variance)                       |                               |                                           |                          |                          |                         |
|-----------------------------------------------------------------------------|-------------------------------|-------------------------------------------|--------------------------|--------------------------|-------------------------|
|                                                                             | Shapiro-Wilk test             |                                           | Levene's test            | <i>P</i> -value          | 95% CI of diff of means |
|                                                                             | <i>Sephs1<sup>fl/fl</sup></i> | <i>Col2a1-cre; Sephs1<sup>fl/fl</sup></i> |                          |                          |                         |
| <i>Sephs1<sup>fl/fl</sup></i> vs. <i>Col2a1-Cre; Sephs1<sup>fl/fl</sup></i> | W = 0.8836                    | W = 0.9396                                | F-value = 5.5856         | <i>P</i> -value < 0.0001 | 0.8305 to 1.1482        |
|                                                                             | <i>P</i> -value = 0.3541      | <i>P</i> -value = 0.6521                  | <i>P</i> -value = 0.0560 |                          |                         |

**Fig. 2k** Quantification of immunofluorescence positivity of  $\gamma$ -H2AX in primary cultured chondrocytes transfected with negative control siRNA or siRNA targeting *Sephs1* followed by NAC treatment at the indicated doses (*n* = 4).

Two-way ANOVA with siRNA and treatment  
 siRNA : treatment interaction as factors  
 $F(1,18) = 58.1002$  for siRNA, *P*-value < 0.0001, *df* = 1  
 $F(2,18) = 34.0279$  for treatment, *P*-value < 0.0001, *df* = 2  
 $F(2,18) = 26.7860$  for siRNA : treatment, *P*-value < 0.0001, *df* = 2

| Dunnett's post-hoc test                                |                 |                          |
|--------------------------------------------------------|-----------------|--------------------------|
| Groups                                                 | <i>P</i> -value | Estimates 95% CI of diff |
| NAC 0 : si <i>Sephs1</i> vs NAC 0 : siNC               | <0.0001         | 16.07 to 27.77           |
| NAC 0 : si <i>Sephs1</i> vs NAC 0.5 : si <i>Sephs1</i> | <0.0001         | 12.63 to 24.33           |
| NAC 0 : si <i>Sephs1</i> vs NAC 0.5 : siNC             | <0.0001         | 16.74 to 28.44           |
| NAC 0 : si <i>Sephs1</i> vs NAC 1 : si <i>Sephs1</i>   | <0.0001         | 15.69 to 27.39           |
| NAC 0 : si <i>Sephs1</i> vs NAC 1 : siNC               | <0.0001         | 17.63 to 29.33           |

**Fig. 2I** Quantification of SA- $\beta$ -Gal positivity in primary cultured chondrocytes transfected with negative control siRNA or siRNA targeting *Sephs1* followed by NAC treatment at the indicated doses ( $n = 4$ ).

|                                                                                                                                                                                                                                                                                                                                                                                                                                                                                   |
|-----------------------------------------------------------------------------------------------------------------------------------------------------------------------------------------------------------------------------------------------------------------------------------------------------------------------------------------------------------------------------------------------------------------------------------------------------------------------------------|
| <p>Two-way ANOVA with siRNA and treatment<br/>                 siRNA : treatment interaction as factors<br/> <math>F(1,18) = 69.7372</math> for siRNA, <math>P</math>-value <math>&lt; 0.0001</math>, <math>df = 1</math><br/> <math>F(2,18) = 16.6613</math> for treatment, <math>P</math>-value <math>&lt; 0.0001</math>, <math>df = 2</math><br/> <math>F(2,18) = 22.6534</math> for siRNA : treatment, <math>P</math>-value <math>&lt; 0.0001</math>, <math>df = 2</math></p> |
|-----------------------------------------------------------------------------------------------------------------------------------------------------------------------------------------------------------------------------------------------------------------------------------------------------------------------------------------------------------------------------------------------------------------------------------------------------------------------------------|

| Dunnett's post-hoc test                                |            |                          |
|--------------------------------------------------------|------------|--------------------------|
| Groups                                                 | $P$ -value | Estimates 95% CI of diff |
| NAC 0 : si <i>Sephs1</i> vs NAC 0 : siNC               | $<0.0001$  | 8.444 to 14.88           |
| NAC 0 : si <i>Sephs1</i> vs NAC 0.5 : si <i>Sephs1</i> | $<0.0001$  | 3.231 to 9.671           |
| NAC 0 : si <i>Sephs1</i> vs NAC 0.5 : siNC             | $<0.0001$  | 7.682 to 14.12           |
| NAC 0 : si <i>Sephs1</i> vs NAC 1 : si <i>Sephs1</i>   | $<0.0001$  | 6.963 to 13.40           |
| NAC 0 : si <i>Sephs1</i> vs NAC 1 : siNC               | $<0.0001$  | 7.714 to 14.15           |

**Fig. 2m and Supplementary Fig. 4c** Relative mRNA expression of SASP factors in chondrocytes transfected with negative control siRNA or siRNA targeting *Sephs1* ( $n = 6$ ).

| Two independent sample $t$ test (equal variance) |                                   |                                   |                                         |                     |                         |
|--------------------------------------------------|-----------------------------------|-----------------------------------|-----------------------------------------|---------------------|-------------------------|
| <b><i>Mmp3</i></b>                               | Shapiro-Wilk test                 |                                   | Levene's test                           | $P$ -value          | 95% CI of diff of means |
|                                                  | siNC                              | si <i>Sephs1</i>                  |                                         |                     |                         |
| siNC vs. si <i>Sephs1</i>                        | W = 0.9407<br>$P$ -value = 0.6652 | W = 0.9574<br>$P$ -value = 0.7997 | F-value = 0.6864<br>$P$ -value = 0.4267 | $P$ -value = 0.0123 | 0.2773 to 1.7878        |

| Two independent sample $t$ test (equal variance) |                                   |                                   |                                         |                     |                         |
|--------------------------------------------------|-----------------------------------|-----------------------------------|-----------------------------------------|---------------------|-------------------------|
| <b><i>Mmp10</i></b>                              | Shapiro-Wilk test                 |                                   | Levene's test                           | $P$ -value          | 95% CI of diff of means |
|                                                  | siNC                              | si <i>Sephs1</i>                  |                                         |                     |                         |
| siNC vs. si <i>Sephs1</i>                        | W = 0.9547<br>$P$ -value = 0.7785 | W = 0.9565<br>$P$ -value = 0.7924 | F-value = 0.0253<br>$P$ -value = 0.8769 | $P$ -value = 0.0084 | 0.2744 to 1.4435        |

| Two independent sample $t$ test (equal variance) |                                   |                                   |                                         |                     |                         |
|--------------------------------------------------|-----------------------------------|-----------------------------------|-----------------------------------------|---------------------|-------------------------|
| <b><i>Mmp13</i></b>                              | Shapiro-Wilk test                 |                                   | Levene's test                           | $P$ -value          | 95% CI of diff of means |
|                                                  | siNC                              | si <i>Sephs1</i>                  |                                         |                     |                         |
| siNC vs. si <i>Sephs1</i>                        | W = 0.9237<br>$P$ -value = 0.5325 | W = 0.9814<br>$P$ -value = 0.9584 | F-value = 3.9749<br>$P$ -value = 0.0742 | $P$ -value = 0.0051 | 0.3996 to 1.7250        |

| Welch's $t$ test (unequal variance) |                                   |                                   |                                         |                     |                         |
|-------------------------------------|-----------------------------------|-----------------------------------|-----------------------------------------|---------------------|-------------------------|
| <b><i>Mmp14</i></b>                 | Shapiro-Wilk test                 |                                   | Levene's test                           | $P$ -value          | 95% CI of diff of means |
|                                     | siNC                              | si <i>Sephs1</i>                  |                                         |                     |                         |
| siNC vs. si <i>Sephs1</i>           | W = 0.9475<br>$P$ -value = 0.7203 | W = 0.8348<br>$P$ -value = 0.1181 | F-value = 6.0763<br>$P$ -value = 0.0334 | $P$ -value = 0.0249 | 0.2223 to 1.5520        |

| Welch's <i>t</i> test (unequal variance) |                          |                          |                          |                          |                         |
|------------------------------------------|--------------------------|--------------------------|--------------------------|--------------------------|-------------------------|
| <b><i>Igfbp7</i></b>                     | Shapiro-Wilk test        |                          | Levene's test            | <i>P</i> -value          | 95% CI of diff of means |
|                                          | siNC                     | si <i>Sephs1</i>         |                          |                          |                         |
| siNC vs. si <i>Sephs1</i>                | W = 0.9607               | W = 0.8915               | F-value = 24.4072        | <i>P</i> -value = 0.0124 | 0.8711 to 3.3142        |
|                                          | <i>P</i> -value = 0.8251 | <i>P</i> -value = 0.3259 | <i>P</i> -value = 0.0006 |                          |                         |

| Two independent sample <i>t</i> test (equal variance) |                          |                          |                          |                          |                         |
|-------------------------------------------------------|--------------------------|--------------------------|--------------------------|--------------------------|-------------------------|
| <b><i>Vegfa</i></b>                                   | Shapiro-Wilk test        |                          | Levene's test            | <i>P</i> -value          | 95% CI of diff of means |
|                                                       | siNC                     | si <i>Sephs1</i>         |                          |                          |                         |
| siNC vs. si <i>Sephs1</i>                             | W = 0.9149               | W = 0.8507               | F-value = 3.0702         | <i>P</i> -value = 0.0375 | 0.0229 to 0.6291        |
|                                                       | <i>P</i> -value = 0.4668 | <i>P</i> -value = 0.1595 | <i>P</i> -value = 0.1103 |                          |                         |

**Fig. 5b** Body weight of 21-week-old DMM-operated mice after completion of the supplementation scheme ( $n \geq 6$ ).

Two-way ANOVA with genotype and treatment  
 $F(2,28) = 0.7594$  for treatment,  $P$ -value = 0.4773,  $df = 2$   
 $F(1,28) = 2.1090$  for genotype,  $P$ -value = 0.1576,  $df = 1$

No post-hoc test was performed after two-way ANOVA analysis.
